# Supplementary material for: Efficacy of PD-1/PD-L1 inhibitors in gastric or gastro-oesophageal junction cancer based on clinical characteristics: a meta-analysis
Source: Springer Nature journal article supplement (doi:10.1186/s12885-023-10605-y), 2023-02-10
Supplement: MOESM1 [file 24015628]

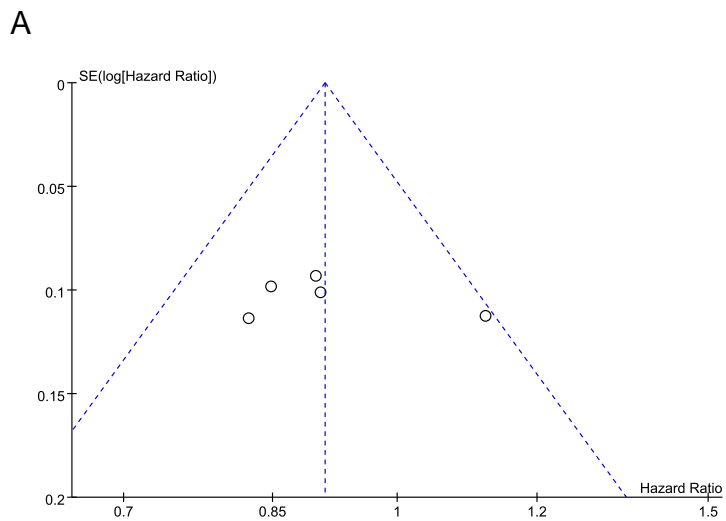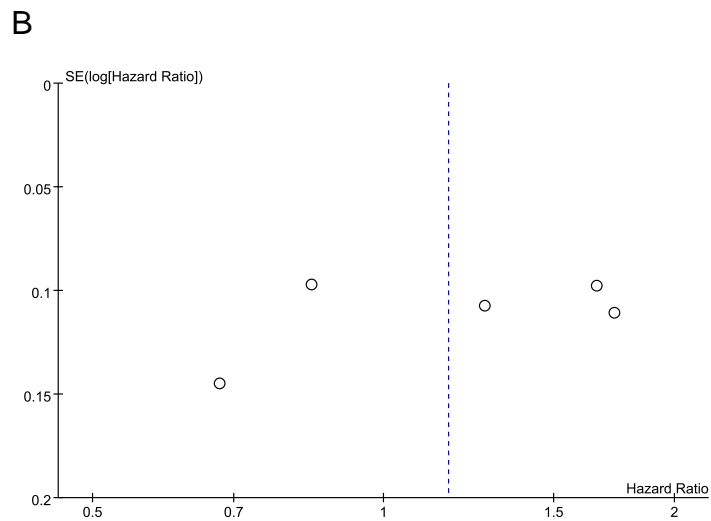

Figure S1: Funnel plots for (A) OS and (B) PFS between anti-PD-1/PD-L1 therapy and chemotherapy.

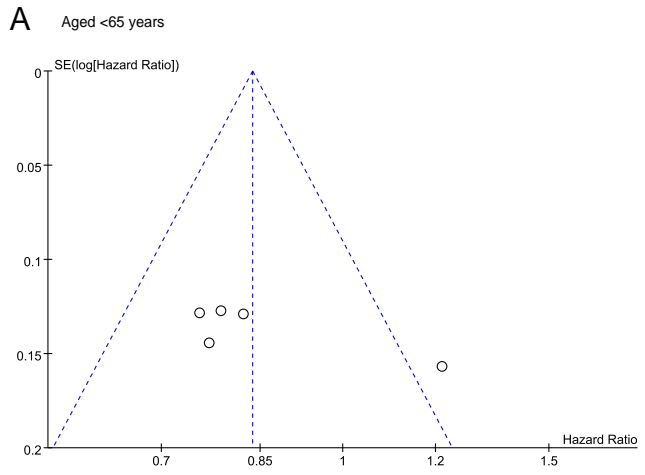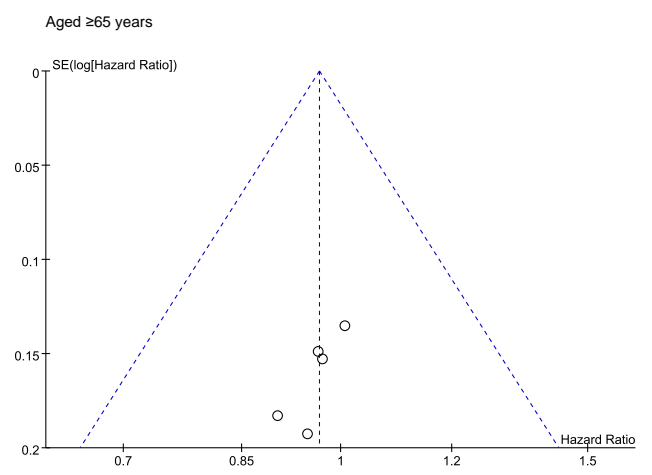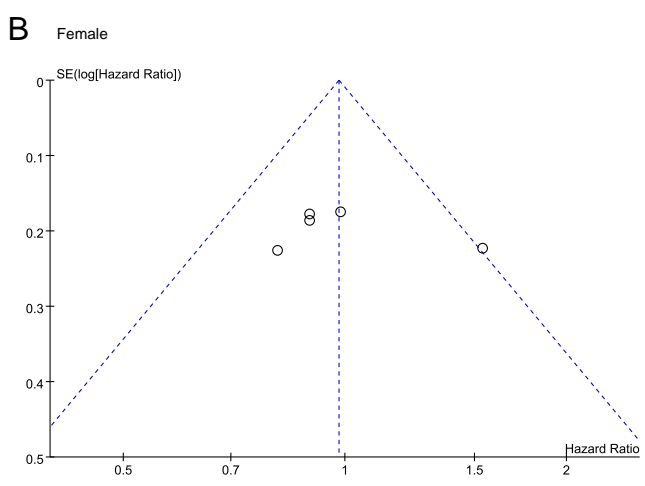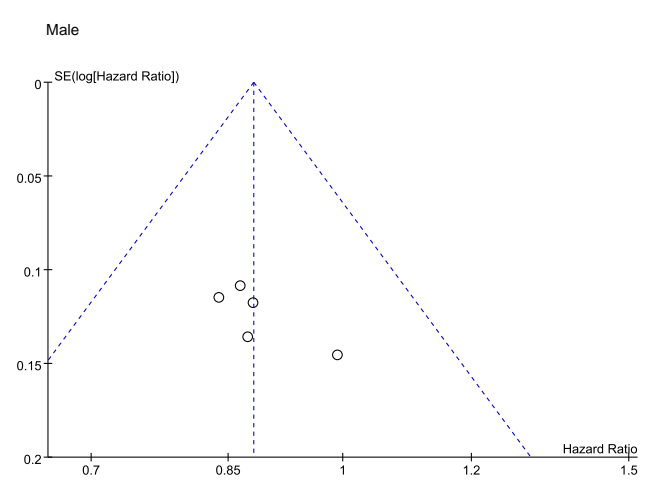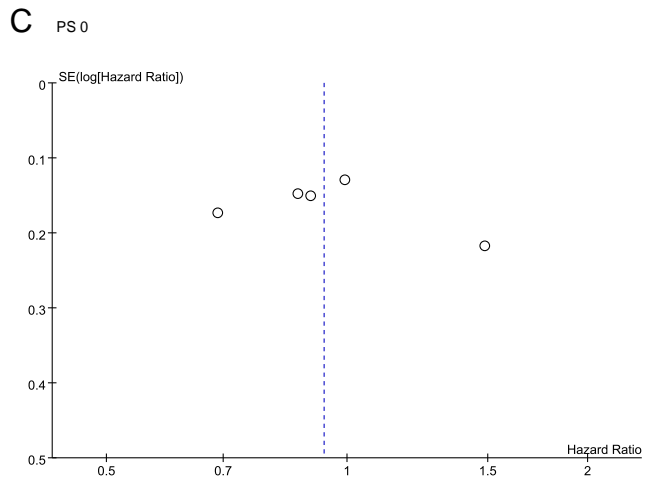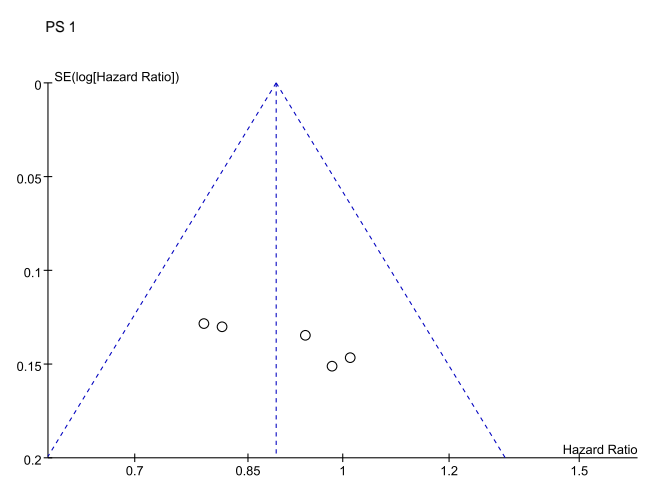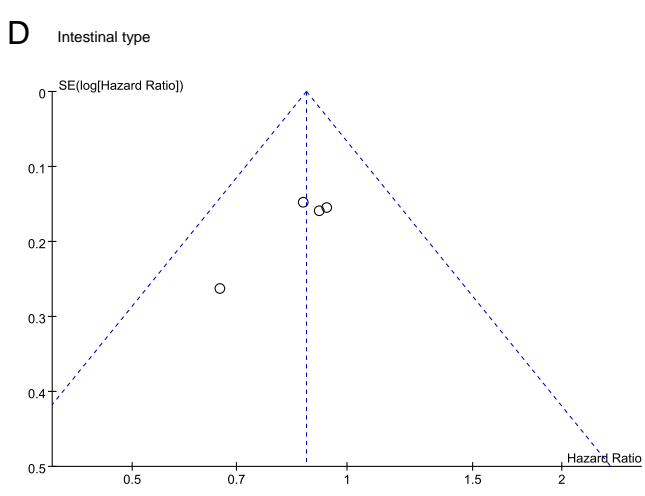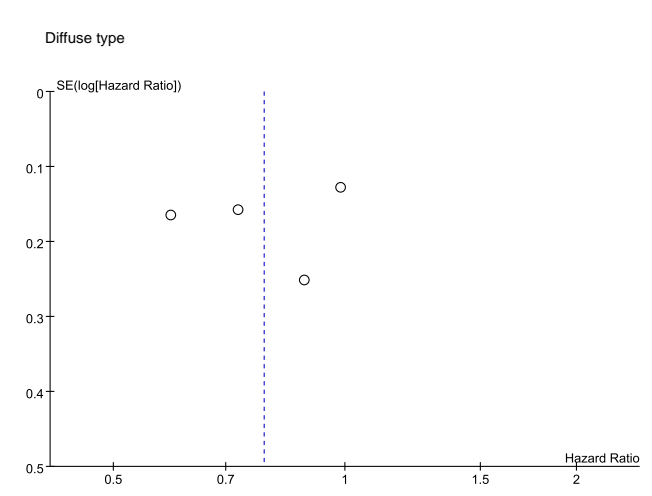

**E** Previous gastrectomy

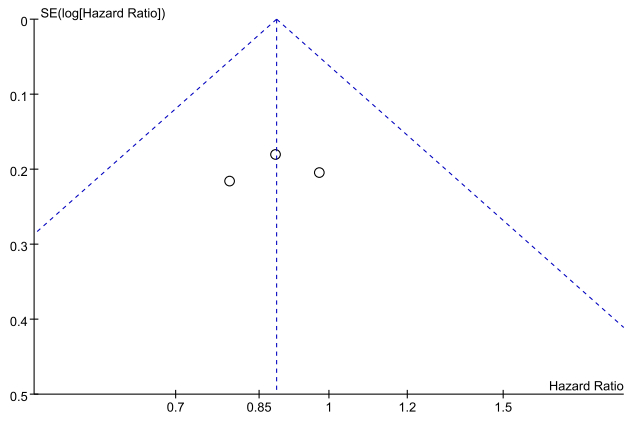

No previous gastrectomy

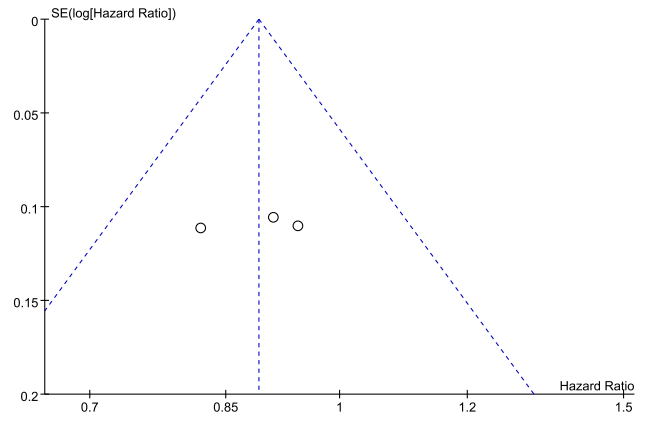

**F** Primary gastric tumour

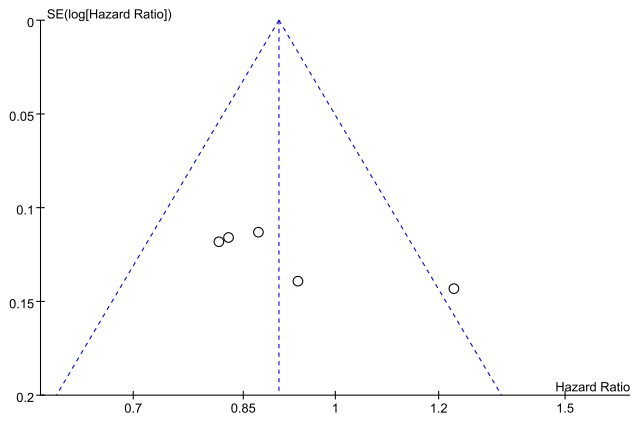

Primary oesophagogastric junction tumour

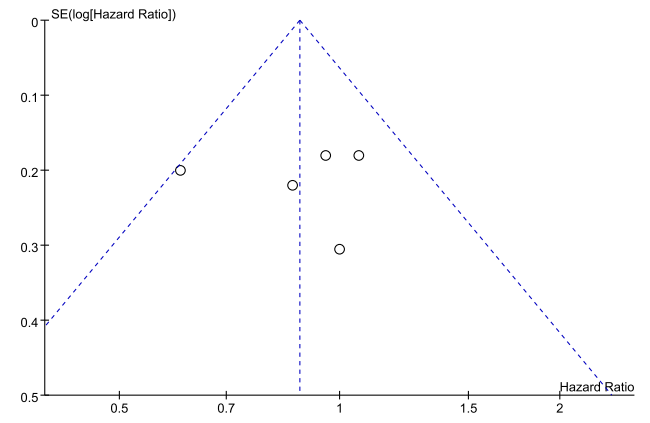

**G** PD-L1 expression on <1% of Tumour-cell

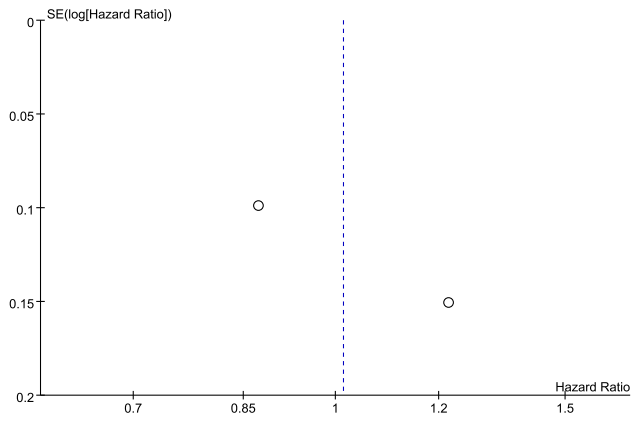

PD-L1 expression on ≥1% of Tumour-cell

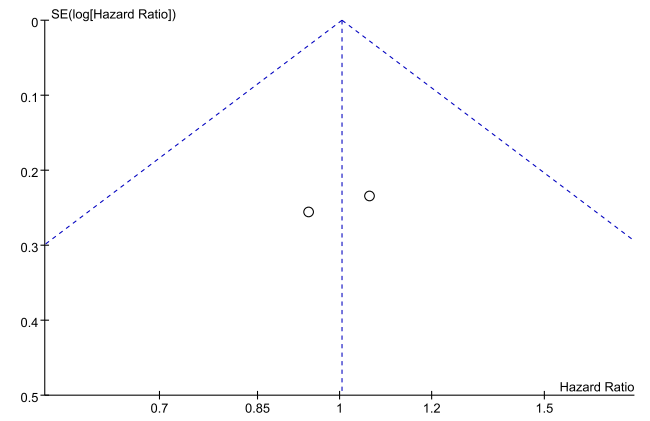

**H** PD-L1 combined positive score of 1 or higher

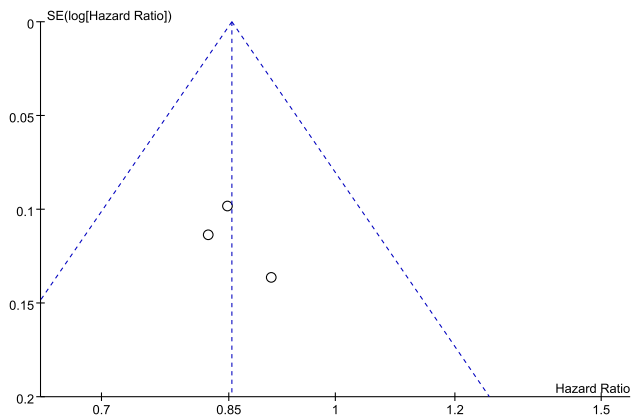

PD-L1 combined positive score of 10 or higher

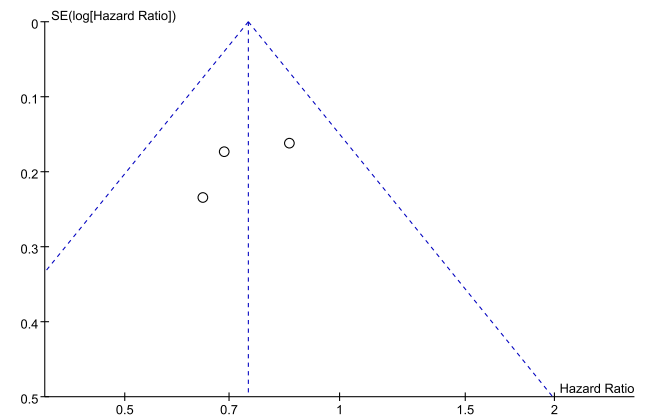

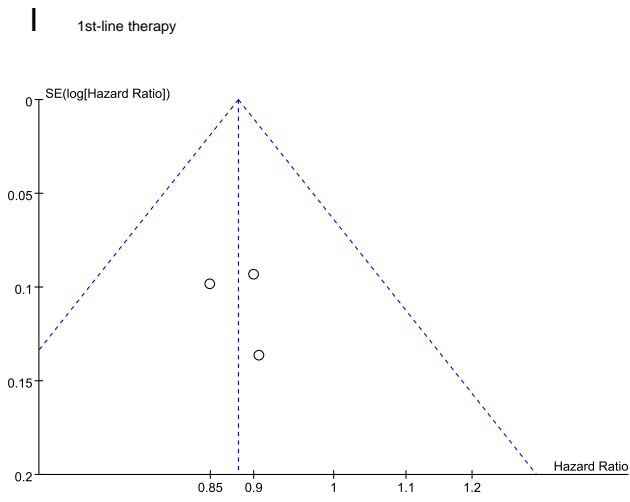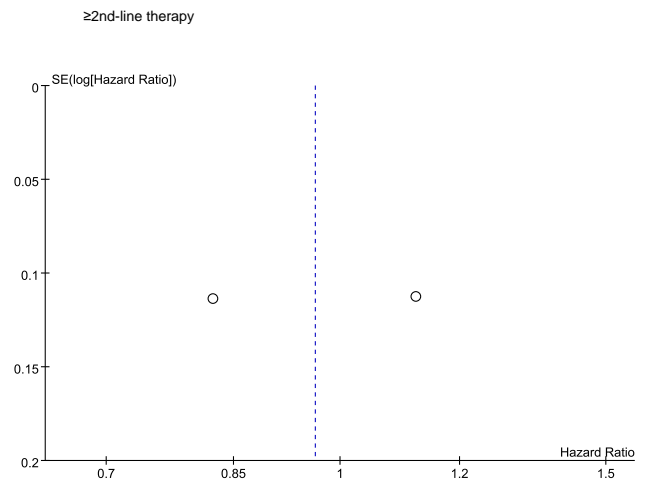

Figure S2: Funnel plots for OS in the subgroup with respect to (A) age group, (B) gender, (C) PS score, (D) Lauren histological type, (E) previous gastrectomy status, (F) primary tumour sites, (G) PD-L1 TPS, (H) PD-L1 CPS, (I) treatment line.
